# Supplementary material for: National survey to estimate sodium and potassium intake and knowledge attitudes and behaviours towards salt consumption of adults in the Sultanate of Oman
Source: PubMed Central journal article supplement (PMC7590363; doi:10.1136/bmjopen-2020-037012), 2020-10-23
Supplement: bmjopen-2020-037012supp002.pdf [file bmjopen-2020-037012supp002.pdf]

**Table S1.** Comparison of the general characteristics of the study participants with those of the national sample of the 2017 WHO STEPS Survey carried out in Oman.

|                          | Salt and Potassium Survey<br>mean (SD) |                |                  | 2017 WHO STEPS National Survey <sup>†</sup><br>mean (95% CI) |                     |                     |
|--------------------------|----------------------------------------|----------------|------------------|--------------------------------------------------------------|---------------------|---------------------|
|                          | All<br>(n=569)                         | Men<br>(n=193) | Women<br>(n=376) | All<br>(n=6,582)                                             | Men<br>(n=3,365)    | Women<br>(n=3,217)  |
| Age (yrs)                | 39.4 (13.1)                            | 38.7 (14.3)    | 39.8 (12.5)      | 38.2 (37.4-39.0)                                             | 38.0 (37.1-38.8)    | 38.6 (37.3-39.8)    |
| Height (cm)              | 159.4 (11.2)                           | 167.9 (9.7)    | 154.9 (9.2)      | -                                                            | 167.4 (166.6-168.2) | 156.1 (155.5-156.6) |
| Weight (kg)              | 74.9 (21.5)                            | 81.4 (22.5)    | 71.4 (20.1)      | -                                                            | 74.9 (73.6-76.2)    | 68.1 (66.6-69.7)    |
| BMI (kg/m <sup>2</sup> ) | 29.3 (7.2)                             | 28.9 (7.6)     | 29.5 (7.0)       | 27.3 (26.9-27.6)                                             | 26.7 (26.3-27.2)    | 27.9 (27.3-28.5)    |
| Waist circ. (cm)         | 93.8 (15.7)                            | 95.0 (15.7)    | 93.2 (15.7)      | -                                                            | 90.0 (89.0-91.0)    | 87.6 (86.1-89.1)    |
| Hip circ. (cm)           | 104.5 (15.0)                           | 102.6 (13.7)   | 105.5 (15.6)     | -                                                            | 101.2 (98.8-103.5)  | 102.5 (99.2-105.7)  |
| Systolic BP (mmHg)       | 125.9 (18.2)                           | 134.0 (17.0)   | 121.7 (17.3)     | 124.9 (124.0-125.7)                                          | 130.3 (129.2-131.4) | 119.1 (117.7-120.4) |
| Diastolic BP (mmHg)      | 80.9 (10.7)                            | 83.4 (11.5)    | 79.7 (10.1)      | 79.5 (78.9-80.1)                                             | 81.5 (80.6-82.5)    | 77.4 (76.7-78.1)    |
| Pulse rate (b/min)       | 79.8 (10.5)                            | 78.5 (11.8)    | 80.4 (9.8)       | 79.4 (78.7-80.2)                                             | 77.7 (76.4-78.9)    | 81.3 (80.6-82.0)    |
| Hypertension (%)         | 30.8                                   | 39.9           | 26.1             | 27.5                                                         | 33.1                | 21.5                |

<sup>†</sup>[https://www.who.int/ncds/surveillance/steps/Oman\\_STEPS\\_2017\\_Data\\_Book.pdf?ua=1](https://www.who.int/ncds/surveillance/steps/Oman_STEPS_2017_Data_Book.pdf?ua=1)
