# Supplementary material for: National survey to estimate sodium and potassium intake and knowledge attitudes and behaviours towards salt consumption of adults in the Sultanate of Oman
Source: PubMed Central journal article supplement (PMC7590363; doi:10.1136/bmjopen-2020-037012), 2020-10-23
Supplement: bmjopen-2020-037012supp003.pdf [file bmjopen-2020-037012supp003.pdf]

**Table S2.** Characteristics of excluded participants and comparison with those included in the final analysis.

| <b>Variable</b>                  | <b>Included<br/>(n=569)</b> | <b>Excluded<br/>(n=159)</b> | <b>P value*</b> |
|----------------------------------|-----------------------------|-----------------------------|-----------------|
| Age (years)                      | 39.4 (13.1)                 | 37.5 (13.9)                 | 0.037           |
| Height (cm)                      | 159.4 (11.2)                | 158.7 (8.6)                 | >0.05           |
| Weight (kg)                      | 74.9 (21.5)                 | 73.4 (18.3)                 | >0.05           |
| BMI (kg/m <sup>2</sup> )         | 29.3 (7.2)                  | 29.1 (7.0)                  | >0.05           |
| Waist circumference (cm)         | 93.8 (15.7)                 | 92.3 (17.9)                 | >0.05           |
| Hip circumference (cm)           | 104.5 (15.0)                | 102.6 (16.4)                | >0.05           |
| Systolic blood pressure (mm Hg)  | 125.9 (18.2)                | 124.2 (18.8)                | >0.05           |
| Diastolic blood pressure (mm Hg) | 80.9 (10.7)                 | 79.1 (11.6)                 | 0.025           |
| Pulse rate (b/min)               | 79.8 (10.5)                 | 80.9 (10.5)                 | >0.05           |
| Hypertension (%)                 | 27.4                        | 23.9                        |                 |

Results are mean (SD), \*by Mann-Whitney U-test

Hypertension: SBP/DBP  $\geq$ 140/90 mmHg
